# Supplementary material for: SDF4 Is a Prognostic Factor for 28-Days Mortality in Patients With Sepsis via Negatively Regulating ER Stress
Source: Front Immunol. 2021 Jul 13;12:659193. doi: 10.3389/fimmu.2021.659193 (PMC8313857; doi:10.3389/fimmu.2021.659193)
Supplement: Supplementary file 4 [file Table_1.xlsx]

## Sheet: Sheet1
GAPDH_human	Forward	GGCATCCTGGGCTACACTGA
GAPDH_human	Reverse	GGAGTGGGTGTCGCTGTTG
SDF4_human	Forward	TGCAGCCAATAGGCACCTTA
SDF4_human	Reverse	ACTCGCTGTACTTGAGCACC
CHOP_human	Forward	GAACCAGGAAACGGAAACAG
CHOP_human	Reverse	ATTCACCATTCGGTCAATCA
GRP78_human	Forward	TGGCGGAACCTTCGATGT
GRP78_human	Reverse	GCCACAACTTCGAAGACACCAT
ATF6_human	Forward	GTTCTTCCGTCAACTCTGAGGC
ATF6_human	Reverse	GGACTCTGTCTTCACTTCCAGG
